# Supplementary material for: Low temperature electrolysis for iron production via conductive colloidal electrode
Source: Royal Society of Chemistry journal article supplement (doi:10.1039/c4ra14576c), 2014-12-08
Supplement: c4ra14576c1.pdf [file c4ra14576c1.pdf]

## Supporting information

### Low Temperature Electrolysis for Iron Production

Qiang Wang, Yi Zhu, Qiuyang Wu, Eric Gratz, Yan Wang\*

Department of Mechanical Engineering, Worcester Polytechnic Institute

100 Institute Road, Worcester, MA 01609

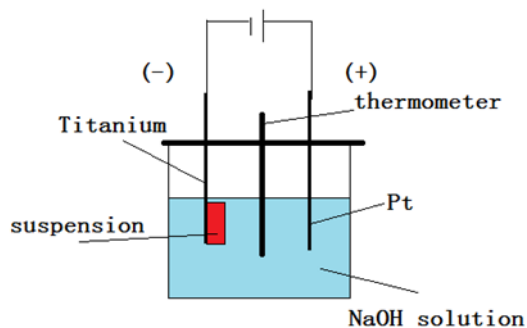

**Figure S 1.** The two-electrode electrolytic cell for  $\text{Fe}_2\text{O}_3$  electrolysis.

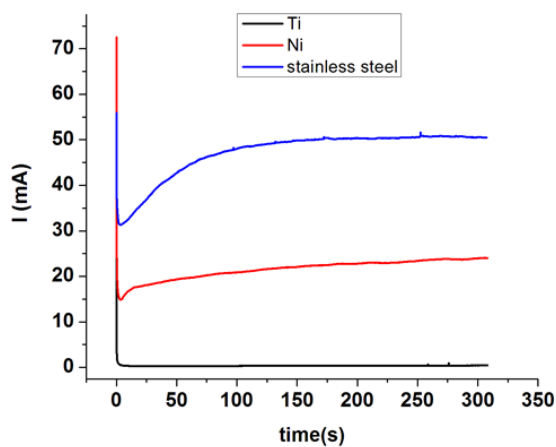

**Figure S 2.** The background current with of three kinds of current collector. Ti plate, Ni plate and stainless steel plate were immersed into NaOH solution separately, and 1.7 V of voltage was applied between the tested material and the Pt foil counter electrode.

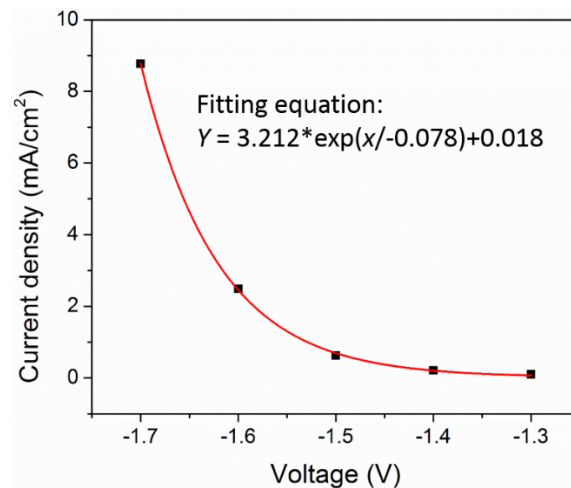

**Figure S 3.** The polarized current density with different voltages setting up in the two-electrodes cell for electrolyzing Fe<sub>2</sub>O<sub>3</sub>. The current density was recorded when electrolyzing carried on for half an hour.
